# Supplementary material for: Unmanned Aerial Vehicle (UAV) for Detection and Prediction of Damage Caused by Potato Cyst Nematode G. pallida on Selected Potato Cultivars
Source: MDPI journal article supplement (doi:10.3390/rs15051429), 2023-03-03
Supplement: s1 [file s1]

## Supplementary Materials:

Figure S1: Field design and distribution of four potato cultivars (Seresta, Sarion, Fontane, and Avarna) used in a series of initial population density,  $P_i = \text{eggs (g dry soil)}^{-1}$ . On the left side of the figure, there exist cultivars with varying host-status to create a density gradient of potato cyst nematodes for the tolerance experiment.

Figure S2: Schematic overview of the 1m<sup>2</sup> grid from which the samples were taken from the estimation of the initial population density,  $P_i = \text{eggs (g dry soil)}^{-1}$ .

Figure S3: Relationship between the  $P_i$ , eggs (g dry soil)<sup>-1</sup> and Chlorophyll content index of four potato cultivars according to Seinhorst yield model Eq. 1 (A. Avarna; B. Fontane; C. Sarion; D. Serresta) E. Relative chlorophyll content index of all the cultivars combined.

Figure S4: Relationship between the  $P_i$ , eggs (g dry soil)<sup>-1</sup> and NDRE index of four potato cultivars according to Seinhorst yield model Eq. 1 (A. Avarna; B. Fontane; C. Sarion; D. Serresta) E. Relative NDRE index of all the cultivars combined.

Table S1: Climate information during the cropping season of potato production: Date (YYYYMMDD); Mean temperature (Mean T) in 0.1 degrees Celsius (°C); Maximum temperature (Max T) in 0.1 degrees Celsius (°C); Minimum temperature (Min T) in 0.1 degrees Celsius (°C); Mean relative atmospheric humidity (Mean RAH) in %; Maximum relative atmospheric humidity (Max RAH) in %; Min relative atmospheric humidity (Min RAH) in %. The data is obtained from the website (<https://www.knmi.nl/home>) of The Royal Netherlands Meteorological Institute (KNMI). The data was recorded from KNMI weather station in Hoogeveen.

Table S2: Comparison of different methods of nematode detection. (Citation numberings are corresponded to those written in the manuscript).

[illegible]

Figure S2: Schematic overview of the 1m<sup>2</sup> grid from which the samples were taken from the estimation of the initial population density,  $P_i$  = eggs (g dry soil)<sup>-1</sup>.

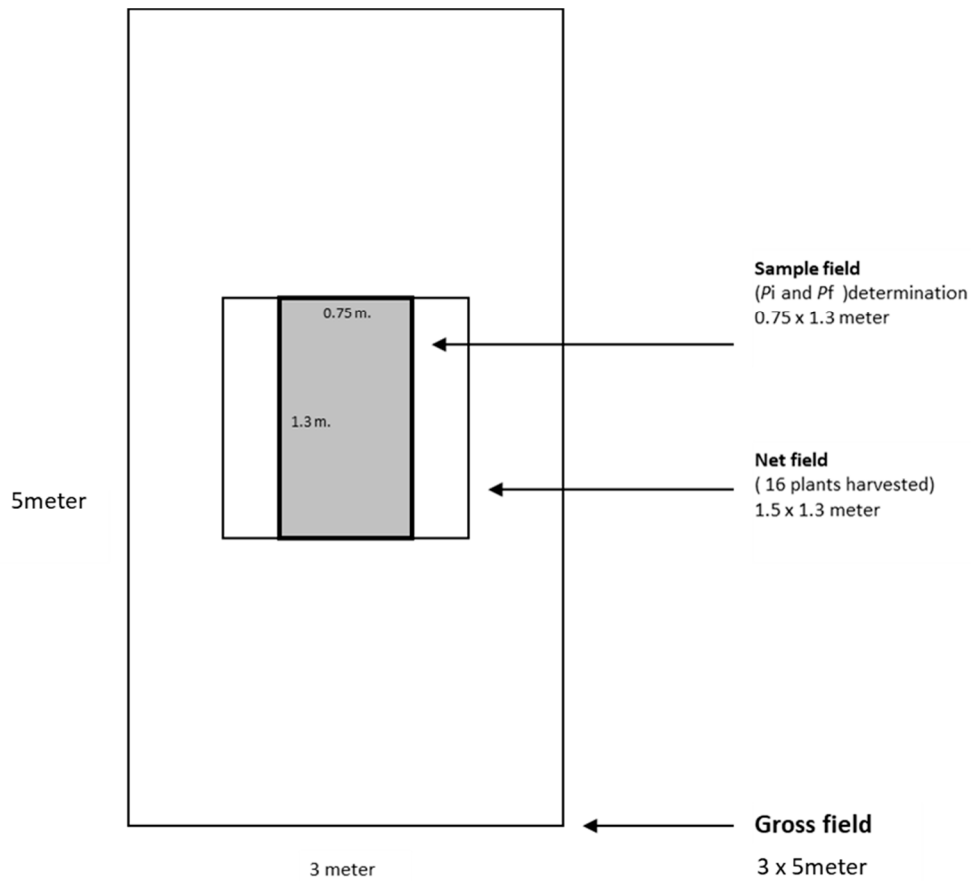

Figure S3: Relationship between the  $P_i$ , eggs (g dry soil)<sup>-1</sup> and Chlorophyll content index of four potato cultivars according to Seinhorst yield model Eq. 1 (A. Avarna; B. Fontane; C. Sarion; D. Serresta) E. Relative chlorophyll content index of all the cultivars combined.

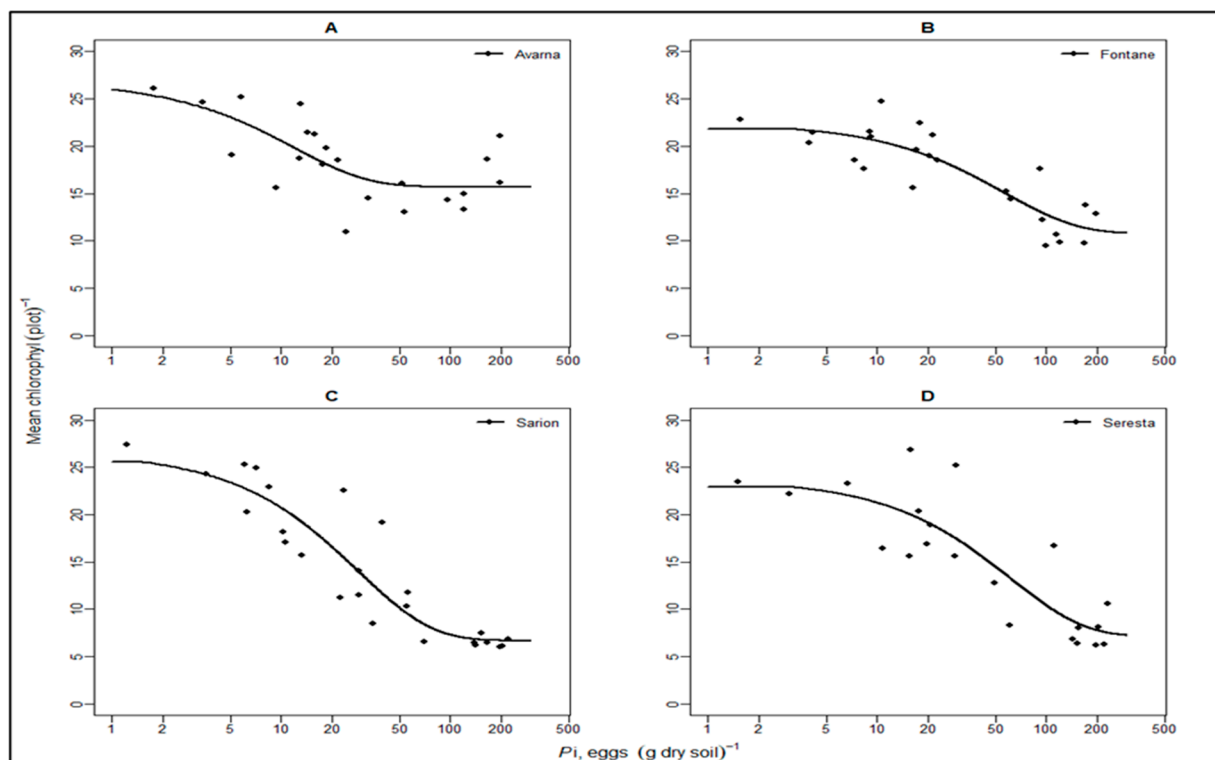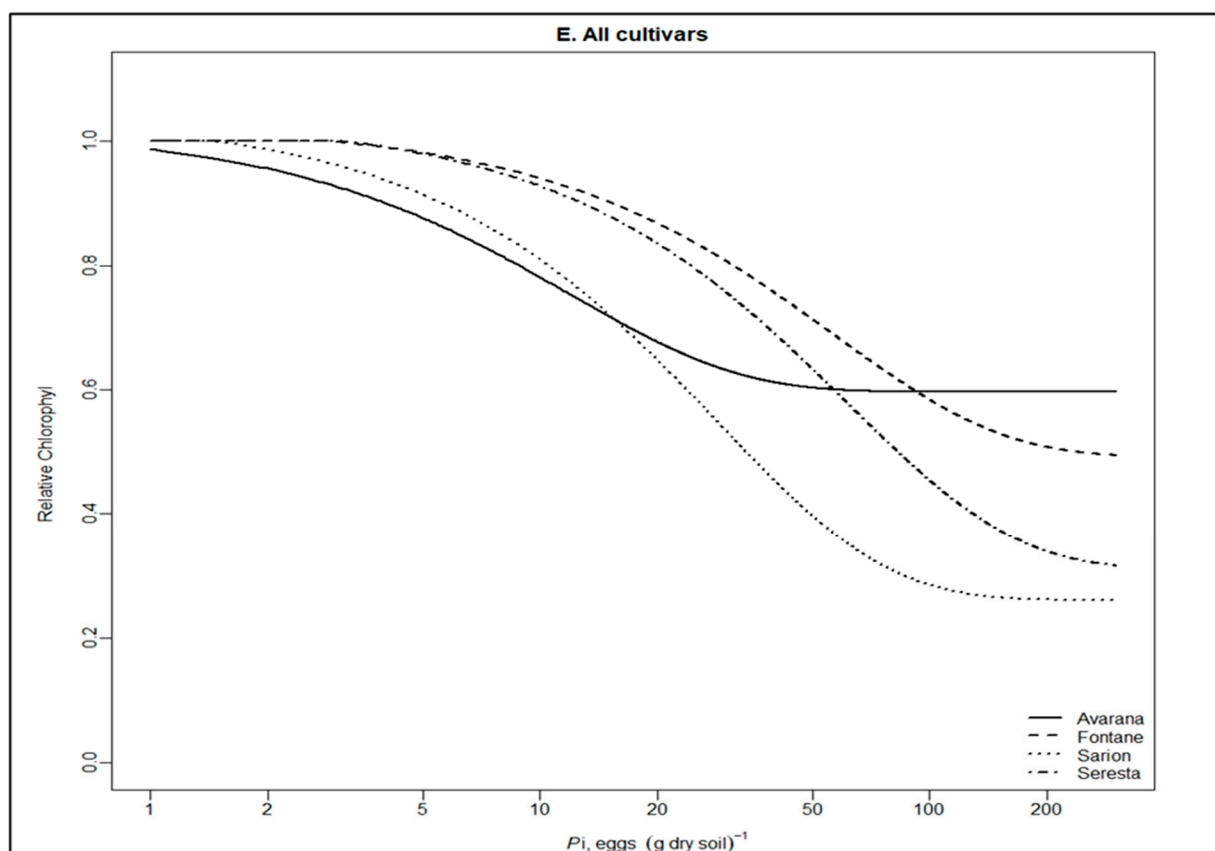

Figure S4: Relationship between the  $P_i$ , eggs (g dry soil)<sup>-1</sup> and NDRE index of four potato cultivars according to Seinhorst yield model Eq. 1 (A. Avarana; B. Fontane; C. Sarion; D. Serresta) E. Relative NDRE index of all the cultivars combined.

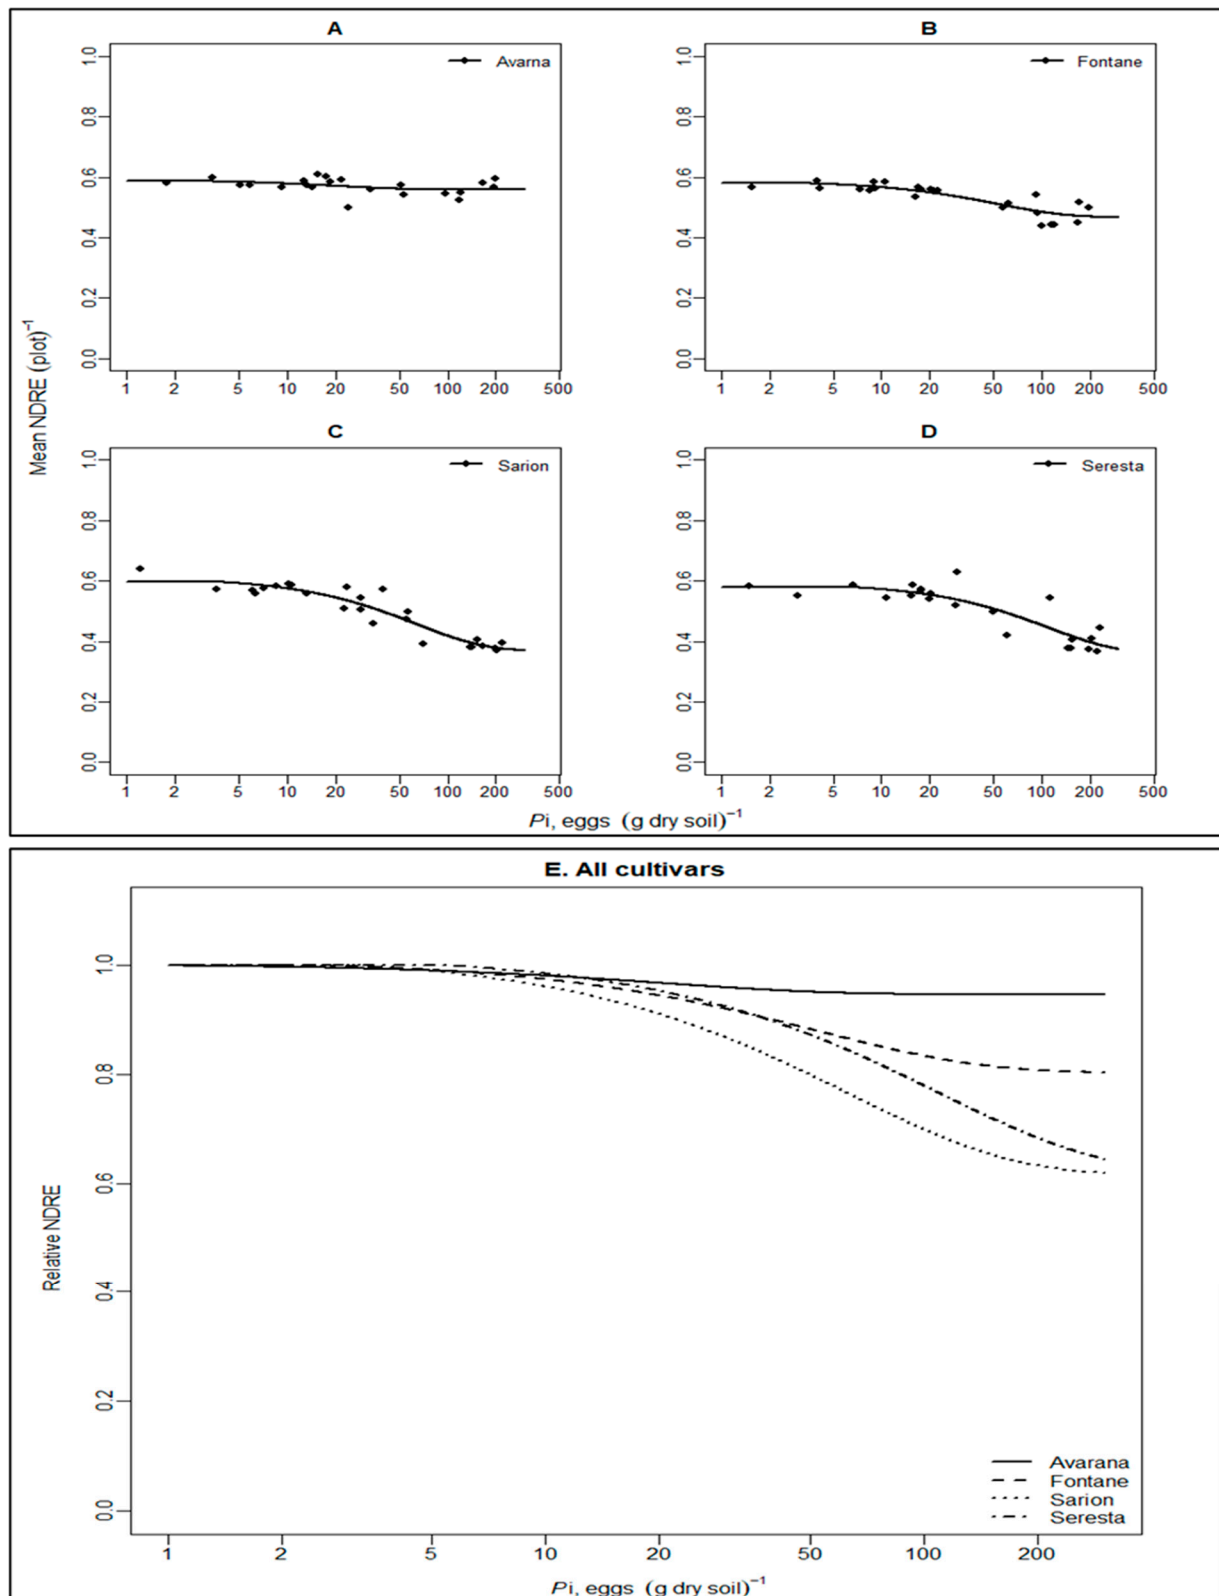

Table S1: Climate information during the cropping season of potato production: Date (YYYYMMDD); Mean temperature (Mean T) in 0.1 degrees Celsius (°C); Maximum temperature (Max T) in 0.1 degrees Celsius (°C); Minimum temperature (Mean T) in 0.1 degrees Celsius (°C); Mean relative atmospheric humidity (Mean RAH) in %; Maximum relative atmospheric humidity (Max RAH) in %; Min relative atmospheric humidity (Min RAH) in %. The data is obtained from the website (<https://www.knmi.nl/home>) of The Royal Netherlands Meteorological Institute (KNMI). The data was recorded from KNMI weather station in Hoogeveen.

| Date     | Mean T | Max T | Min T | Mean RAH | Max RAH | Min RAH |
|----------|--------|-------|-------|----------|---------|---------|
| 20190519 | 164    | 249   | 91    | 78       | 98      | 38      |
| 20190520 | 145    | 196   | 112   | 91       | 98      | 78      |
| 20190521 | 133    | 164   | 114   | 89       | 98      | 78      |
| 20190522 | 128    | 184   | 69    | 73       | 96      | 41      |
| 20190523 | 144    | 226   | 49    | 63       | 98      | 38      |
| 20190524 | 147    | 226   | 67    | 66       | 94      | 35      |
| 20190525 | 125    | 181   | 85    | 75       | 92      | 55      |
| 20190526 | 158    | 211   | 85    | 77       | 97      | 58      |
| 20190527 | 141    | 184   | 100   | 72       | 96      | 46      |
| 20190528 | 109    | 157   | 31    | 73       | 94      | 53      |
| 20190529 | 126    | 189   | 24    | 61       | 98      | 37      |
| 20190530 | 164    | 206   | 126   | 77       | 91      | 63      |
| 20190531 | 178    | 234   | 107   | 73       | 97      | 51      |
| 20190601 | 179    | 249   | 107   | 72       | 94      | 42      |
| 20190602 | 227    | 300   | 127   | 58       | 94      | 33      |
| 20190603 | 172    | 214   | 111   | 73       | 92      | 59      |
| 20190604 | 193    | 248   | 118   | 68       | 92      | 39      |
| 20190605 | 192    | 236   | 158   | 77       | 96      | 55      |
| 20190606 | 144    | 192   | 84    | 84       | 98      | 61      |
| 20190607 | 161    | 234   | 77    | 70       | 98      | 46      |
| 20190608 | 140    | 168   | 120   | 70       | 84      | 58      |
| 20190609 | 151    | 208   | 88    | 69       | 87      | 42      |
| 20190610 | 178    | 232   | 123   | 77       | 98      | 56      |
| 20190611 | 155    | 199   | 108   | 86       | 100     | 60      |
| 20190612 | 149    | 184   | 101   | 84       | 96      | 71      |
| 20190613 | 149    | 203   | 111   | 73       | 93      | 47      |
| 20190614 | 181    | 242   | 105   | 72       | 94      | 47      |
| 20190615 | 162    | 201   | 100   | 89       | 99      | 64      |
| 20190616 | 163    | 215   | 93    | 82       | 100     | 60      |
| 20190617 | 192    | 260   | 100   | 71       | 100     | 45      |
| 20190618 | 207    | 275   | 122   | 71       | 98      | 41      |
| 20190619 | 195    | 257   | 132   | 79       | 98      | 55      |
| 20190620 | 174    | 217   | 129   | 82       | 98      | 61      |

|          |     |     |     |    |     |    |
|----------|-----|-----|-----|----|-----|----|
| 20190621 | 153 | 208 | 81  | 77 | 97  | 57 |
| 20190622 | 158 | 220 | 71  | 74 | 98  | 54 |
| 20190623 | 212 | 287 | 119 | 61 | 93  | 39 |
| 20190624 | 247 | 316 | 180 | 55 | 68  | 37 |
| 20190625 | 271 | 349 | 184 | 57 | 86  | 36 |
| 20190626 | 200 | 242 | 142 | 77 | 95  | 58 |
| 20190627 | 157 | 206 | 119 | 71 | 82  | 58 |
| 20190628 | 171 | 237 | 109 | 70 | 96  | 46 |
| 20190629 | 218 | 321 | 93  | 60 | 98  | 23 |
| 20190630 | 207 | 267 | 114 | 67 | 96  | 48 |
| 20190701 | 178 | 233 | 121 | 70 | 93  | 48 |
| 20190702 | 161 | 221 | 87  | 65 | 98  | 42 |
| 20190703 | 137 | 205 | 69  | 67 | 100 | 38 |
| 20190704 | 160 | 228 | 46  | 68 | 98  | 49 |
| 20190705 | 175 | 223 | 106 | 69 | 97  | 49 |
| 20190706 | 151 | 213 | 98  | 81 | 98  | 66 |
| 20190707 | 138 | 176 | 92  | 67 | 87  | 46 |
| 20190708 | 131 | 178 | 92  | 76 | 94  | 54 |
| 20190709 | 143 | 209 | 66  | 67 | 98  | 39 |
| 20190710 | 136 | 197 | 63  | 77 | 99  | 38 |
| 20190711 | 167 | 214 | 123 | 90 | 98  | 73 |
| 20190712 | 171 | 228 | 113 | 87 | 100 | 63 |
| 20190713 | 164 | 213 | 136 | 79 | 98  | 60 |
| 20190714 | 145 | 176 | 123 | 80 | 98  | 66 |
| 20190715 | 150 | 199 | 122 | 76 | 92  | 55 |
| 20190716 | 150 | 168 | 134 | 83 | 89  | 78 |
| 20190717 | 173 | 245 | 115 | 75 | 98  | 43 |
| 20190718 | 191 | 262 | 105 | 72 | 98  | 42 |
| 20190719 | 197 | 254 | 137 | 68 | 100 | 35 |
| 20190720 | 191 | 243 | 156 | 79 | 96  | 58 |
| 20190721 | 176 | 223 | 109 | 76 | 98  | 50 |
| 20190722 | 194 | 266 | 112 | 77 | 98  | 58 |
| 20190723 | 235 | 323 | 123 | 65 | 100 | 29 |
| 20190724 | 275 | 368 | 180 | 56 | 91  | 22 |
| 20190725 | 292 | 390 | 166 | 53 | 99  | 22 |
| 20190726 | 284 | 356 | 203 | 42 | 70  | 15 |
| 20190727 | 256 | 325 | 194 | 46 | 73  | 26 |
| 20190728 | 226 | 308 | 165 | 67 | 89  | 29 |
| 20190729 | 211 | 268 | 152 | 67 | 94  | 41 |
| 20190730 | 215 | 307 | 116 | 65 | 98  | 28 |
| 20190731 | 176 | 235 | 140 | 81 | 96  | 56 |
| 20190801 | 170 | 223 | 124 | 86 | 98  | 66 |
| 20190802 | 175 | 228 | 138 | 88 | 98  | 66 |
| 20190803 | 171 | 213 | 122 | 82 | 98  | 59 |
| 20190804 | 178 | 244 | 96  | 78 | 100 | 51 |

|          |     |     |     |    |     |    |
|----------|-----|-----|-----|----|-----|----|
| 20190805 | 197 | 253 | 157 | 76 | 93  | 54 |
| 20190806 | 184 | 235 | 134 | 77 | 98  | 51 |
| 20190807 | 180 | 230 | 133 | 77 | 97  | 52 |
| 20190808 | 179 | 242 | 100 | 74 | 100 | 47 |
| 20190809 | 176 | 217 | 89  | 90 | 100 | 70 |
| 20190810 | 202 | 237 | 168 | 66 | 92  | 44 |
| 20190811 | 183 | 234 | 142 | 65 | 81  | 44 |
| 20190812 | 162 | 216 | 127 | 81 | 98  | 55 |
| 20190813 | 140 | 193 | 104 | 85 | 98  | 54 |
| 20190814 | 153 | 215 | 77  | 76 | 98  | 44 |
| 20190815 | 169 | 206 | 139 | 88 | 98  | 72 |
| 20190816 | 176 | 218 | 122 | 74 | 96  | 57 |
| 20190817 | 172 | 204 | 149 | 92 | 98  | 82 |
| 20190818 | 162 | 195 | 127 | 89 | 97  | 74 |
| 20190819 | 161 | 210 | 121 | 77 | 94  | 55 |
| 20190820 | 150 | 215 | 88  | 80 | 98  | 55 |
| 20190821 | 149 | 223 | 65  | 77 | 100 | 48 |
| 20190822 | 162 | 250 | 71  | 73 | 100 | 42 |
| 20190823 | 175 | 260 | 77  | 72 | 99  | 39 |
| 20190824 | 206 | 296 | 128 | 64 | 95  | 28 |
| 20190825 | 215 | 311 | 112 | 65 | 95  | 26 |
| 20190826 | 237 | 319 | 138 | 66 | 98  | 36 |
| 20190827 | 248 | 337 | 164 | 63 | 96  | 28 |
| 20190828 | 226 | 301 | 153 | 74 | 98  | 42 |
| 20190829 | 192 | 248 | 109 | 80 | 100 | 54 |
| 20190830 | 167 | 248 | 86  | 74 | 100 | 34 |
| 20190831 | 197 | 296 | 88  | 71 | 100 | 29 |
| 20190901 | 155 | 207 | 101 | 79 | 97  | 52 |
| 20190902 | 144 | 201 | 94  | 74 | 97  | 47 |
| 20190903 | 161 | 201 | 120 | 79 | 93  | 65 |
| 20190904 | 150 | 193 | 107 | 87 | 97  | 68 |
| 20190905 | 128 | 167 | 75  | 83 | 96  | 67 |
| 20190906 | 133 | 180 | 73  | 76 | 97  | 55 |
| 20190907 | 130 | 179 | 88  | 91 | 100 | 75 |
| 20190908 | 129 | 189 | 79  | 86 | 98  | 51 |
| 20190909 | 114 | 184 | 45  | 83 | 100 | 56 |
| 20190910 | 117 | 183 | 47  | 85 | 100 | 61 |
| 20190911 | 138 | 161 | 80  | 94 | 98  | 79 |
| 20190912 | 182 | 225 | 153 | 80 | 98  | 56 |
| 20190913 | 154 | 200 | 63  | 78 | 98  | 50 |
| 20190914 | 119 | 195 | 47  | 80 | 99  | 46 |
| 20190915 | 143 | 209 | 62  | 83 | 97  | 68 |
| 20190916 | 126 | 166 | 86  | 90 | 98  | 72 |
| 20190917 | 119 | 164 | 77  | 79 | 94  | 50 |
| 20190918 | 102 | 164 | 50  | 83 | 97  | 58 |



|          |     |     |     |    |     |    |
|----------|-----|-----|-----|----|-----|----|
| 20190919 | 97  | 172 | 35  | 78 | 100 | 47 |
| 20190920 | 103 | 179 | 24  | 84 | 100 | 58 |
| 20190921 | 141 | 224 | 60  | 68 | 99  | 40 |
| 20190922 | 177 | 255 | 92  | 67 | 93  | 41 |
| 20190923 | 159 | 201 | 124 | 91 | 98  | 72 |
| 20190924 | 149 | 194 | 103 | 87 | 98  | 68 |
| 20190925 | 151 | 182 | 131 | 89 | 98  | 72 |
| 20190926 | 155 | 173 | 127 | 95 | 98  | 88 |
| 20190927 | 151 | 184 | 131 | 86 | 97  | 73 |
| 20190928 | 147 | 183 | 127 | 88 | 97  | 67 |
| 20190929 | 143 | 160 | 125 | 96 | 98  | 91 |
| 20190930 | 134 | 164 | 111 | 86 | 96  | 66 |
| 20191001 | 134 | 181 | 97  | 94 | 98  | 78 |
| 20191002 | 102 | 138 | 72  | 84 | 97  | 60 |
| 20191003 | 107 | 156 | 67  | 88 | 97  | 69 |
| 20191004 | 90  | 97  | 61  | 95 | 98  | 89 |
| 20191005 | 86  | 136 | 32  | 87 | 100 | 67 |
| 20191006 | 85  | 102 | 59  | 83 | 90  | 74 |
| 20191007 | 87  | 127 | 21  | 85 | 96  | 69 |
| 20191008 | 129 | 159 | 109 | 91 | 98  | 77 |
| 20191009 | 106 | 137 | 84  | 92 | 96  | 79 |
| 20191010 | 115 | 148 | 86  | 85 | 97  | 70 |
| 20191011 | 139 | 160 | 121 | 89 | 96  | 80 |
| 20191012 | 118 | 158 | 109 | 96 | 98  | 83 |
| 20191013 | 157 | 207 | 110 | 91 | 98  | 81 |
| 20191014 | 139 | 159 | 118 | 92 | 98  | 86 |
| 20191015 | 146 | 180 | 124 | 92 | 98  | 78 |
| 20191016 | 132 | 156 | 111 | 94 | 98  | 79 |
| 20191017 | 133 | 155 | 118 | 92 | 98  | 77 |
| 20191018 | 120 | 157 | 97  | 86 | 97  | 76 |
| 20191019 | 108 | 134 | 88  | 91 | 98  | 83 |
| 20191020 | 103 | 121 | 63  | 97 | 100 | 92 |
| 20191021 | 124 | 167 | 105 | 89 | 100 | 79 |
| 20191022 | 118 | 144 | 81  | 94 | 100 | 85 |
| 20191023 | 104 | 151 | 43  | 94 | 100 | 80 |
| 20191024 | 139 | 181 | 103 | 88 | 98  | 77 |
| 20191025 | 134 | 155 | 111 | 84 | 96  | 74 |
| 20191026 | 160 | 187 | 126 | 76 | 95  | 65 |
| 20191027 | 93  | 126 | 64  | 82 | 96  | 66 |
| 20191028 | 70  | 130 | 27  | 87 | 98  | 62 |
| 20191029 | 48  | 111 | 3   | 88 | 100 | 66 |
| 20191030 | 31  | 90  | -8  | 87 | 98  | 66 |

Table S2: Comparison of different methods of nematode detection. (Citation numberings are corresponded to those written in the manuscript).

|                       | Method                                              | Type         | Time-consumption                   | Advantages                                                             | Disadvantages                                                                                                                        | References |
|-----------------------|-----------------------------------------------------|--------------|------------------------------------|------------------------------------------------------------------------|--------------------------------------------------------------------------------------------------------------------------------------|------------|
| Existing methods      | Soil Sampling                                       | Classic      | Slow<br>(Days to weeks)            | Accuracy<br>Standardized                                               | Only a small area can be sampled;<br>It requires knowledge of nematode sytematics;<br>Expensive (Labor, Microscope)                  | [34,35]    |
|                       | Plant/root Sampling                                 | Classic      | Slow                               | Relatively<br>Inexpensive                                              | Only few plants can be sampled;<br>It requires knowledge of nematode systematics                                                     | [12]       |
|                       | Virtual Inspection for morphological characteristic | Classic      | Quick                              | Inexpensive<br>Quick                                                   | Inaccurate;<br>Subjective;<br>Complex to operate and requires specialized technicians;<br>Advanced training and experience required: | [34]       |
|                       | Biochemical and PCR-based methods                   | Last decades | It varies depending on the methods | Sensitivity<br>Accuracy is getting better                              | Expensive<br>(Reagent, qPCR equipment, labor)<br>Need to be trained for interpretation                                               | [22]       |
|                       |                                                     |              |                                    |                                                                        |                                                                                                                                      |            |
| Precision Agriculture | Sensing technology (UAV/Satellite)                  | New          | Relatively fast                    | Relatively fast;<br>Whole field can be scanned ;<br>Dynamic monitoring | It requires professional expertise.<br>Processing images takes time to generate a map                                                | [22]       |
